# Supplementary material for: 3D ordered nanoporous NiMoO4 for high-performance supercapacitor electrode materials
Source: Royal Society of Chemistry journal article supplement (doi:10.1039/c4ra09118c), 2014-01-01
Supplement: c4ra09118c1.pdf [file c4ra09118c1.pdf]

*Electronic Supplementary Information (ESI)*

## **3D ordered nanoporous NiMoO<sub>4</sub> for high-performance supercapacitor electrode materials**

**Seyyed Ebrahim Moosavifard,<sup>\*a</sup> Javad Shamsi,<sup>b</sup> Saeed Fani,<sup>c</sup> Saeid Kadkhodazade<sup>c</sup>**

<sup>a</sup>Young Researchers and Elite Club, Central Tehran Branch, Islamic Azad University, Tehran, Iran.

<sup>b</sup>Department of Chemistry, University of Tehran, Tehran, Iran.

<sup>c</sup>Department of Chemistry, University of Science and Technology, Tehran, Iran.

<sup>d</sup>Chemistry and Chemical Engineering Research Center of Iran, Tehran, Iran.

\*Corresponding author. E-mail: [info\\_seyyed@yahoo.com](mailto:info_seyyed@yahoo.com). Tel/Fax: +98 21 82883455

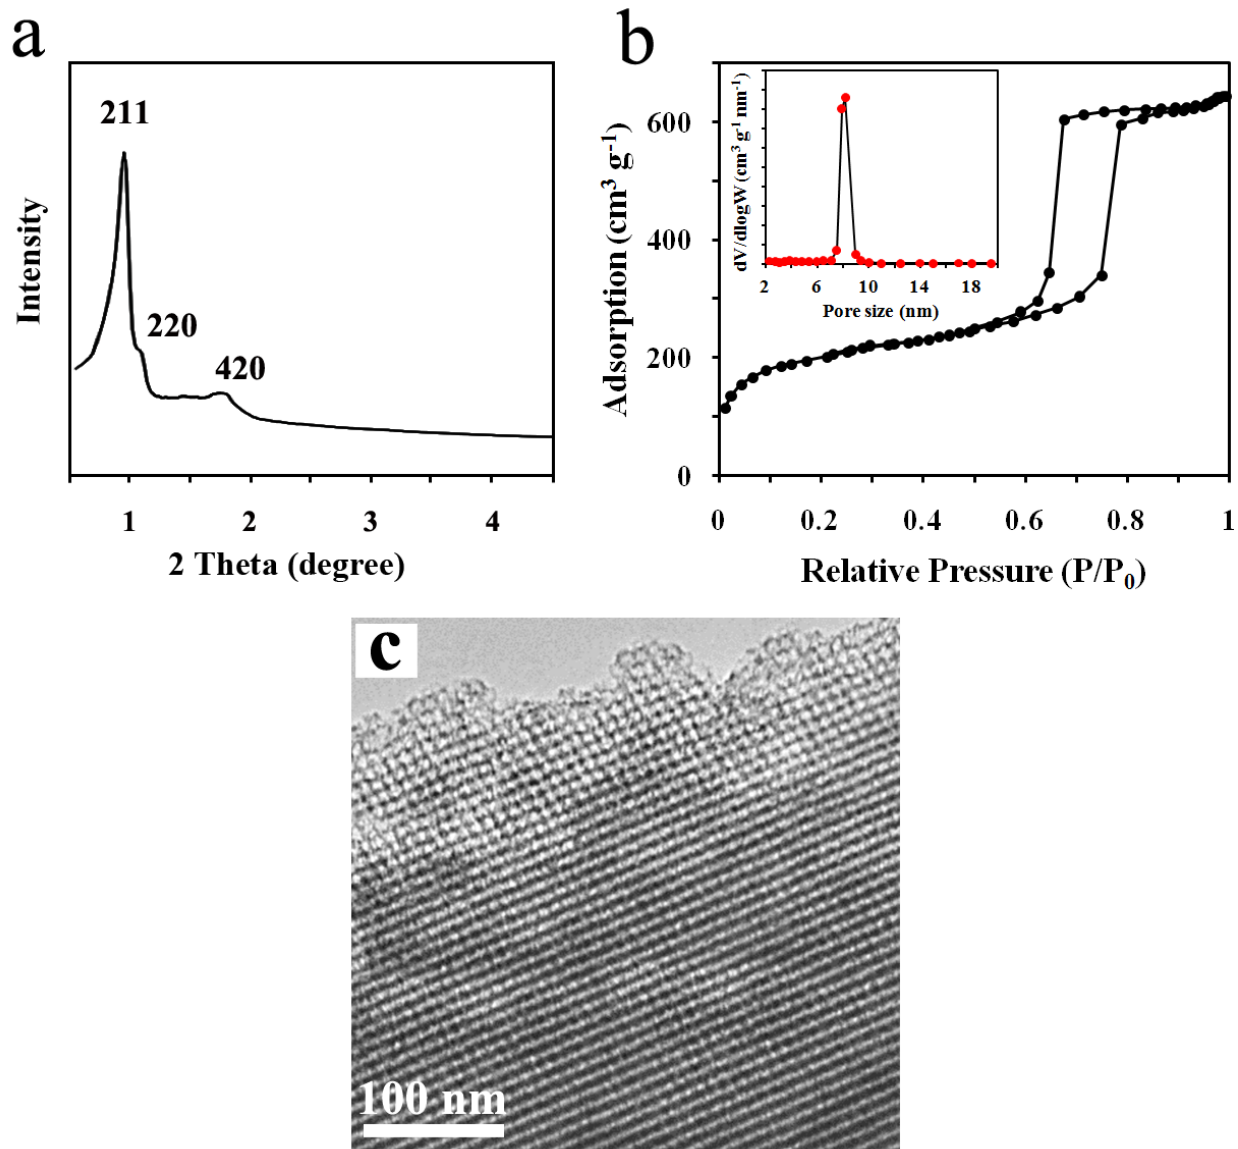

**Fig. S1** Characterization of KIT-6 treated at 50°C aging temperature. Low angle XRD pattern (a) indicates clear (211), (220) and (420) reflections which are typical for cubic ordered Mesoporous structure with Ia-3d symmetry. N<sub>2</sub>-physisorption isotherm (b) is of type IV isotherm with a pronounced capillary condensation step, which is characteristic for high-quality large pore mesoporous material. The pore size distribution (b, in insert) is centered at around 8 nm. TEM image (c) confirmed highly ordered mesoporous structure.

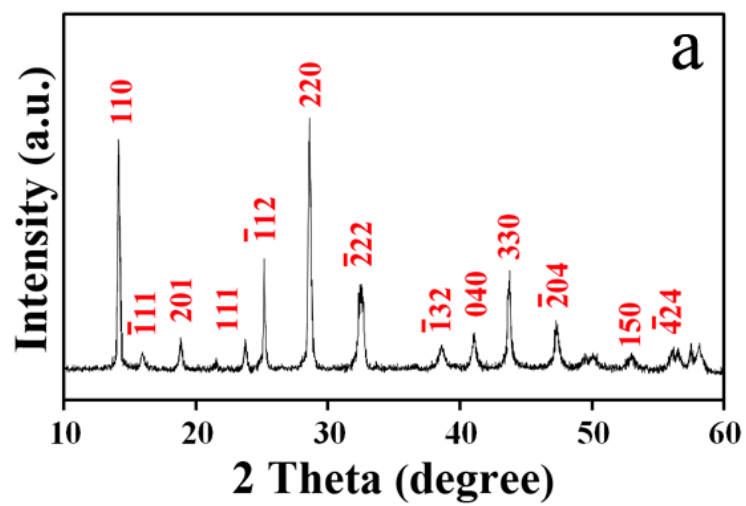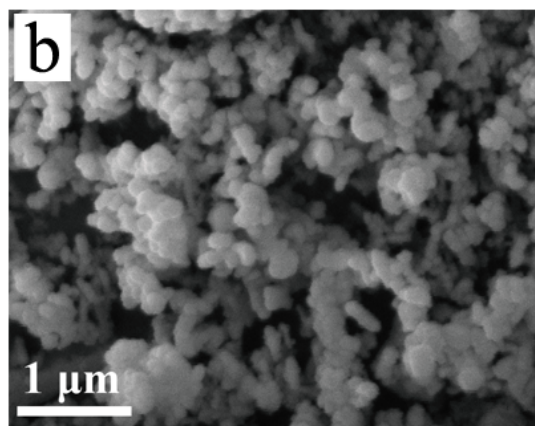

**Fig. S2** Wide-angle PXRD pattern of bulk  $\text{NiMoO}_4$  (a), and typical SEM image of the bulk  $\text{NiMoO}_4$  (b).

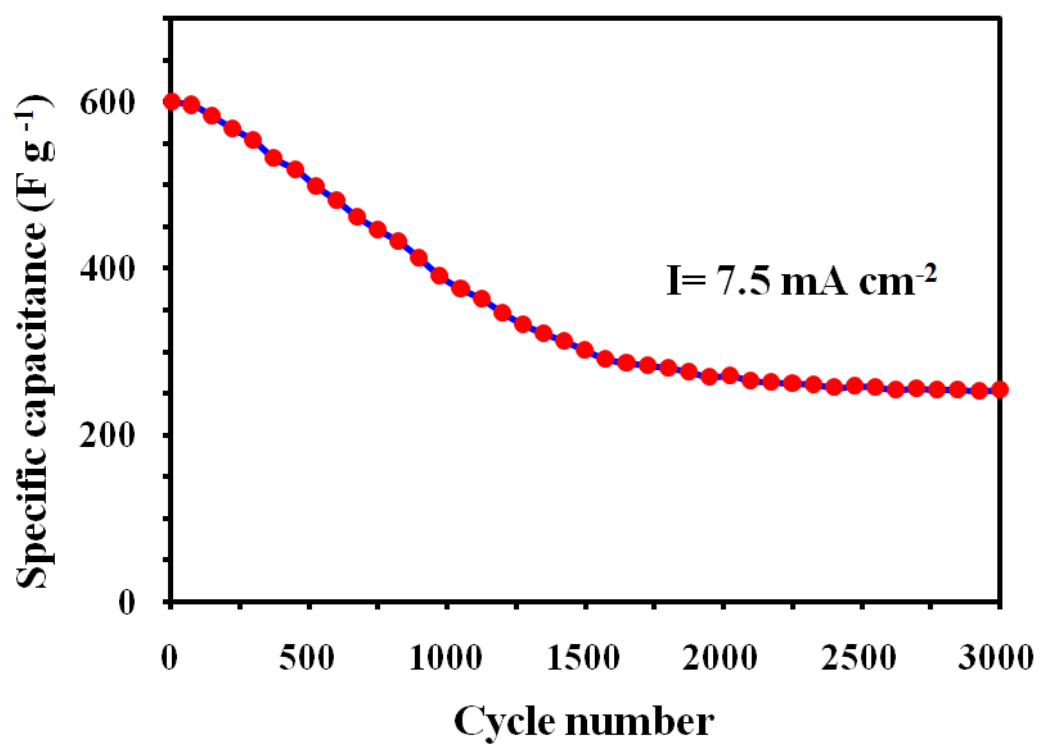

**Fig. S3** The long-term cycling stability of the bulk NiMoO<sub>4</sub> electrode at 7.5 mA cm<sup>-2</sup> in 3 M KOH electrolyte.
